# Supplementary material
Source: HighWire-hosted journal article supplement (https://www.annfammed.org/highwire/filestream/7797/field_highwire_adjunct_files/1/Pace_HIPAA_App2.pdf)
Supplement: Pace_HIPAA_App2.pdf [file Pace_HIPAA_App2.pdf]

# ANNALS OF FAMILY MEDICINE

## Online Supplementary Material

Pace WD, Staton EW, Holcomb S. Practice-based research network studies in the age of HIPAA. *Ann Fam Med*. 2005;3(Suppl 1):S38-S45.

[http://www.annfammed.org/cgi/content/full/3/suppl\\_1/S38](http://www.annfammed.org/cgi/content/full/3/suppl_1/S38)

### Supplemental Appendix 2. Example of an Authorization for Recruitment

|                                                                                                                                                                                                                                                                                                                                                                                                                                                                                                                                                                                                                                                                                                                                                                                                                                                                                                                                                                                                                                                                                                                                                                                                                                                                                                                                                                                                                                                                                                                                                                                                                                                                                                                                                                                                                                                                                                                                                     |                                                                    |
|-----------------------------------------------------------------------------------------------------------------------------------------------------------------------------------------------------------------------------------------------------------------------------------------------------------------------------------------------------------------------------------------------------------------------------------------------------------------------------------------------------------------------------------------------------------------------------------------------------------------------------------------------------------------------------------------------------------------------------------------------------------------------------------------------------------------------------------------------------------------------------------------------------------------------------------------------------------------------------------------------------------------------------------------------------------------------------------------------------------------------------------------------------------------------------------------------------------------------------------------------------------------------------------------------------------------------------------------------------------------------------------------------------------------------------------------------------------------------------------------------------------------------------------------------------------------------------------------------------------------------------------------------------------------------------------------------------------------------------------------------------------------------------------------------------------------------------------------------------------------------------------------------------------------------------------------------------|--------------------------------------------------------------------|
| <p><b>Authorization to Release<br/>Health Information About Me<br/>for Research Purposes</b><br/><i>Authorization A: Research Recruitment</i></p>                                                                                                                                                                                                                                                                                                                                                                                                                                                                                                                                                                                                                                                                                                                                                                                                                                                                                                                                                                                                                                                                                                                                                                                                                                                                                                                                                                                                                                                                                                                                                                                                                                                                                                                                                                                                   | <p><b>Research Area:</b></p> <p><b>Study Title (if known):</b></p> |
| <p>I _____ (<i>Patient's Full Name</i>) <b>authorize</b><br/>         _____ (<i>Referring Physician's Name</i>)<br/> <b>and staff members of</b> _____ (<i>Facility Name</i>) <b>working for him/her</b><br/> <b>to use or give the following health information about me <u>for the purpose of research recruitment</u>:</b></p> <p><input type="checkbox"/> Name, Address and/or Phone number<br/> <input type="checkbox"/> Other (Specify)</p> <hr/> <p>This information will be given to:</p> <hr/> <p>I give my authorization knowing that:</p> <ul style="list-style-type: none"> <li>• I do not have to sign this authorization. If I do not sign it, my information will not be released for research recruitment.</li> <li>• I can cancel this authorization any time.             <ul style="list-style-type: none"> <li>▪ I have to cancel it in writing.</li> <li>▪ If I cancel it, the researchers and the people my information was given to may have already used the information, but they will not use it in the future.</li> <li>▪ I can read the Notice of Privacy Practices at the facility where the research is being conducted to find out how to cancel my authorization.</li> </ul> </li> <li>• The records given out to other people may be given out by them and might no longer be protected.</li> <li>• I will be given a copy of this form after I have signed and dated it.</li> </ul> <p>This authorization will expire on: _____ OR <input type="checkbox"/> Will not expire</p> <p>ADDITIONAL INFORMATION: _____</p> <hr/> <p>_____<br/>         Patient's Signature <span style="float: right;">Date</span></p> <hr/> <p>_____<br/>         Signature of Legal Representative (if applicable) <span style="float: right;">Date</span></p> <hr/> <p>_____<br/>         Name of Legal Representative (please print)</p> <hr/> <p>_____<br/>         Description of Legal Authority to Act on Behalf of Patient</p> |                                                                    |

Adapted with permission from the Colorado Multiple Institutional Review Board (COMIRB), <http://comirbweb.uchsc.edu>.
